# Supplementary material for: Molecular Toxicological Mechanisms of Synthetic Cathinones on C2C12 Myoblasts
Source: Int J Mol Sci. 2019 Mar 28;20(7):1561. doi: 10.3390/ijms20071561 (PMC6479684; doi:10.3390/ijms20071561)

## **Supplemental file**

### **Methods**

#### *Cell line and maintenance for cells used for western blotting*

C2C12 myoblasts (American Type Culture Collection, USA) were kindly provided by Novartis (Basel, Switzerland). Cells were cultured in Dulbecco's Modified Eagle Medium – GlutaMAX supplemented with 10% fetal bovine serum (FBS) and 1% HEPES (Gibco, UK). Cells were maintained at 37°C in a humidified 5% CO<sub>2</sub> cell culture incubator, were passaged using trypsin upon reaching approximately 60% confluency and seeded in appropriate well plates prior differentiation into myotubes. Two days after seeding the medium was replaced by differentiation medium (DM) containing DMEM-Glutamax and 1% HEPES supplemented with 2% horse serum (Gibco, UK) and 0.029 % insulin (stock: 10mg/mL) (Sigma-Aldrich, USA) for three days. They were then starved in DMEM-Glutamax and 1% HEPES supplemented with 2% horse serum (Gibco, UK), without insulin. Myoblasts and myotubes were then treated for 24 hours with DMSO 0.1 %.

#### *Western Blotting*

C2C12 myoblasts and myotubes were lysed with RIPA buffer (150 mM sodium chloride, 1.0% NP-40, 0.5% sodium deoxycholate, 0.1% sodium dodecyl sulphate, 50 mM Tris, pH 8.0) containing complete Mini protease inhibitor cocktail (Roche Diagnostics, Mannheim, Germany). Proteins (10 µg) were resolved by SDS-PAGE using commercially available 4–12% NuPAGE Bis-Tris gels (Invitrogen, Basel, Switzerland) and transferred using the Trans-Blot Turbo Blotting System (Bio-Rad, Cressier, Switzerland). The membranes were incubated with antibodies against SOD2 (#13194, cell signaling, 1/2000), and GAPDH (sc-365062, santa cruz, 1/6000). Membranes were probed with secondary antibodies conjugated to horse radish peroxidase (HRP). Immunoblots were developed using Clarity

Western ECL Substrate (Bio-Rad Laboratories, Hercules, USA). Protein expression was quantified using the Fusion Pulse TS device (Vilber Lourmat, Oberschwaben, Germany).

## Figure Legends

### Suppl. Fig. 1. Oxygen consumption rate (OCR) in C2C12 cells after 1 h drug exposure.

Basal respiration, leak respiration, and maximal respiration are expressed as mean  $\pm$  SEM of at least three independent experiments. Drug treatments were compared to vehicle control with ANOVA followed by Dunett's test. Significance levels are given as \* $p < 0.05$ , \*\* $p < 0.01$ , \*\*\* $p < 0.001$ .

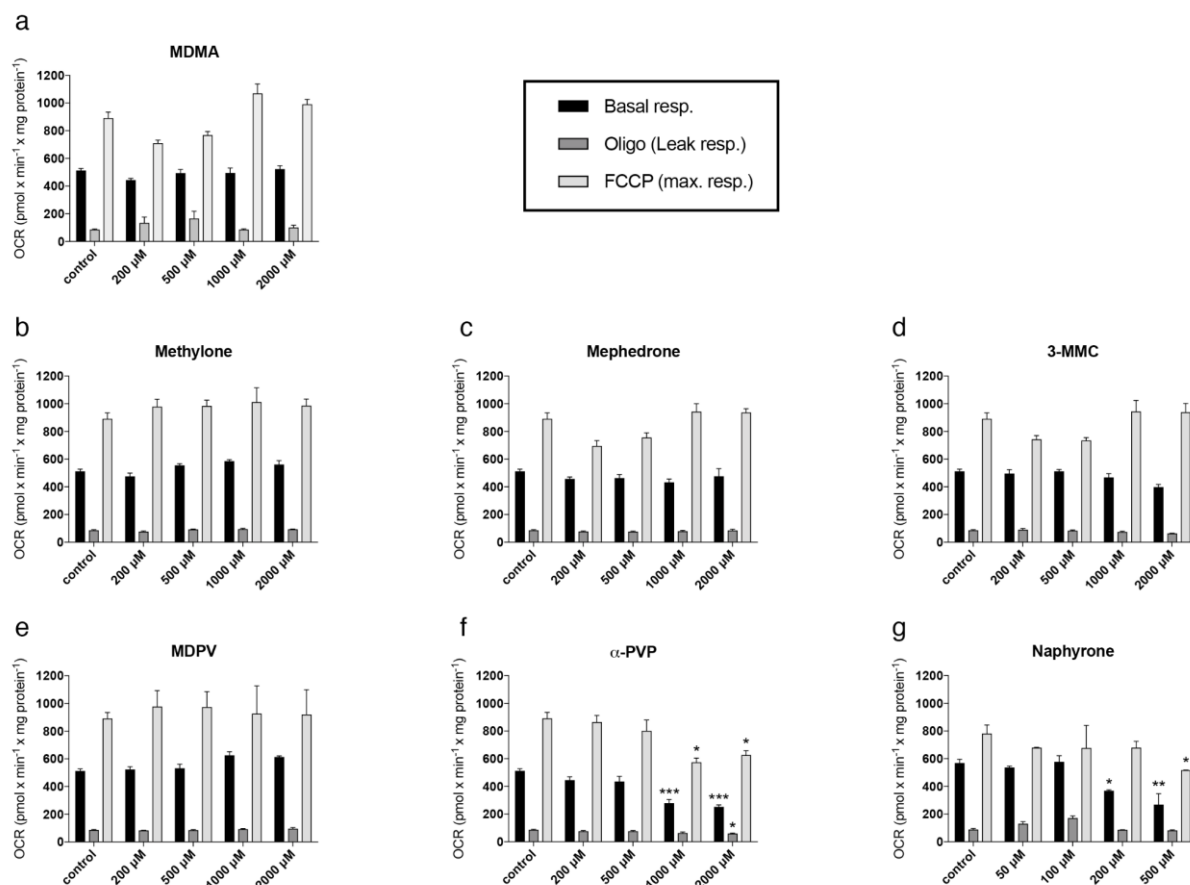

**Suppl. Fig. 2. SOD2 protein expression in myoblasts and myotubes.** Western blots showing the expression levels of SOD2 and GAPDH. The graph shows the quantification of SOD2 protein expression normalized against GAPDH. Data represent the mean $\pm$ SEM. N= 3. \* p < 0.05.

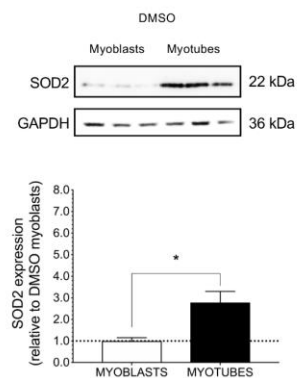

Supplement: Supplementary file 1 [file ijms-20-01561-s001.pdf]
